# Supplementary material for: Microbial communities and isotopes as novel tracers for groundwater flow paths in the multi-layered aquifer system in Kurikka, western Finland
Source: Copernicus journal article supplement (doi:10.5194/egusphere-2025-4755), 2025-10-22
Supplement: Supplementary file 1 [file Supplementary material for article.pdf › Supplementary material for article.pdf]

## Supplementary material for article

### **Microbial communities and isotopes as novel tracers for groundwater flow paths in the multi-layered aquifer system in Kurikka, western Finland**

Lotta Purkamo<sup>1</sup>, Juuso Ikonen<sup>1</sup>, Marie-Amelie Pétré<sup>1</sup>, Niko Putkinen<sup>1</sup>, Minna Myllyperkiö<sup>1</sup>, Anna-Maria Hokajärvi<sup>2</sup>, Tarja Pitkänen<sup>2,3</sup>, Ilkka Miettinen<sup>2</sup>

<sup>1</sup>Geological Survey of Finland (GTK), Espoo, 02150, Finland

<sup>2</sup>Finnish Institute for Health and Welfare (THL), Department of Public Health, Kuopio, 70210, Finland

<sup>3</sup>University of Helsinki, Faculty of Veterinary Medicine, Helsinki, 00014, Finland

Supplementary material includes three tables and three Krona-charts as .html-files in a zipped folder.

Supplementary Table 1: Geochemistry analysis results from the sampled water

| ID      | Ag    | Al   | As   | B    | Ba   | Be   | Bi   | Cd    | Co    | Cr   | Cu   | I    | Li   | Mn   |
|---------|-------|------|------|------|------|------|------|-------|-------|------|------|------|------|------|
|         | 0.01  | 1    | 0.1  | 2    | 0.05 | 0.1  | 1    | 0.02  | 0.05  | 0.2  | 0.1  | 2    | 0.1  | 0.02 |
|         | µg/l  | µg/l | µg/l | µg/l | µg/l | µg/l | µg/l | µg/l  | µg/l  | µg/l | µg/l | µg/l | µg/l | µg/l |
| NOPPA15 | <0.01 | 2.1  | 2.48 | 6.55 | 17.4 | <0.1 | <1   | <0.02 | 1.25  | <0.2 | <0.1 | 10.2 | 4.68 | 426  |
| MIHP6   | <0.01 | 3.12 | 0.2  | 8.59 | 17.2 | <0.1 | <1   | <0.02 | 0.14  | <0.2 | <0.1 | 2.16 | 6.45 | 214  |
| MIHP15  | <0.01 | 1.26 | 3.07 | 7.54 | 22.6 | <0.1 | <1   | <0.02 | <0.05 | <0.2 | <0.1 | 3.88 | 5.66 | 403  |
| R56     | <0.01 | 3.52 | <0.1 | 42   | 1.82 | <0.1 | <1   | <0.02 | <0.05 | <0.2 | 0.14 | 15.4 | 1.39 | 52.3 |
| LOHI30  | <0.01 | 7.01 | 9.52 | 6.99 | 21.5 | <0.1 | <1   | <0.02 | <0.05 | 0.3  | <0.1 | 2.9  | 4.25 | 969  |
| KUU19   | <0.01 | <1   | <0.1 | 2.79 | 6.82 | <0.1 | <1   | <0.02 | <0.05 | 0.55 | <0.1 | 2.37 | 3.69 | 0.68 |
| HÄJY30  | <0.01 | 1.01 | 9.35 | 13.2 | 29.9 | <0.1 | <1   | <0.02 | 0.16  | <0.2 | <0.1 | 5.29 | 4.91 | 594  |
| MIETO17 | <0.01 | 3.28 | 1.03 | 6.41 | 13.9 | <0.1 | <1   | <0.02 | 0.74  | <0.2 | <0.1 | 2.24 | 6    | 654  |
| HARJA10 | <0.01 | 6.69 | 21   | 3.3  | 13.6 | <0.1 | <1   | <0.02 | 2.16  | 1.26 | 0.11 | 2.1  | 2.74 | 563  |
| HÄJY11  | <0.01 | 1.63 | <0.1 | 6.16 | 9.33 | <0.1 | <1   | <0.02 | <0.05 | <0.2 | <0.1 | <2   | 4.18 | 2.29 |

| ID      | Mo   | Ni    | P    | Pb    | Rb   | Sb   | Se   | Sn   | Sr   | Th    | Tl    | U     | V     | Zn   |
|---------|------|-------|------|-------|------|------|------|------|------|-------|-------|-------|-------|------|
|         | 0.1  | 0.05  | 50   | 0.05  | 0.01 | 0.1  | 0.5  | 1    | 0.1  | 0.01  | 0.01  | 0.01  | 0.05  | 0.5  |
|         | µg/l | µg/l  | µg/l | µg/l  | µg/l | µg/l | µg/l | µg/l | µg/l | µg/l  | µg/l  | µg/l  | µg/l  | µg/l |
| NOPPA15 | <0.1 | 1.47  | 129  | <0.05 | 0.5  | <0.1 | <0.5 | <1   | 101  | <0.01 | <0.01 | 0.02  | 0.13  | 0.78 |
| MIHP6   | <0.1 | 0.22  | <50  | <0.05 | 0.16 | <0.1 | <0.5 | <1   | 46.7 | <0.01 | <0.01 | 0.03  | 0.13  | <0.5 |
| MIHP15  | <0.1 | <0.05 | 194  | <0.05 | 0.73 | <0.1 | <0.5 | <1   | 82.7 | <0.01 | <0.01 | <0.01 | 0.07  | <0.5 |
| R56     | <0.1 | <0.05 | 64.8 | <0.05 | 1.95 | <0.1 | <0.5 | <1   | 91.5 | <0.01 | <0.01 | 0.1   | <0.05 | <0.5 |
| LOHI30  | <0.1 | 0.06  | 681  | <0.05 | 0.27 | <0.1 | <0.5 | <1   | 86   | <0.01 | <0.01 | 0.02  | 1.13  | 0.5  |
| KUU19   | <0.1 | 0.42  | <50  | <0.05 | 0.02 | <0.1 | <0.5 | <1   | 38.3 | <0.01 | <0.01 | 0.02  | 0.18  | 5.01 |
| HÄJY30  | <0.1 | 0.08  | 489  | <0.05 | 0.26 | <0.1 | <0.5 | <1   | 107  | <0.01 | <0.01 | 0.02  | 0.11  | 4.68 |
| MIETO17 | <0.1 | 0.58  | 118  | <0.05 | 0.44 | <0.1 | <0.5 | <1   | 70.1 | <0.01 | <0.01 | <0.01 | 0.12  | 1.18 |
| HARJA10 | <0.1 | 2     | 698  | <0.05 | 0.24 | <0.1 | <0.5 | <1   | 74   | 0.01  | <0.01 | 0.04  | 2.48  | 3.61 |
| HÄJY11  | <0.1 | 0.14  | <50  | <0.05 | 0.08 | <0.1 | <0.5 | <1   | 56.5 | <0.01 | <0.01 | 0.02  | 0.25  | 1.21 |

| ID      | Ca   | Fe    | K    | Mg   | Na   | S    | Si   | DOC  | TOC | Br   | Cl  | F   | NO3   | SO4 |
|---------|------|-------|------|------|------|------|------|------|-----|------|-----|-----|-------|-----|
|         | 0.1  | 0.03  | 0.1  | 0.1  | 1    | 0.2  | 0.1  | 0.2  | 0.2 | 0.1  | 0.2 | 0.1 | 0.2   | 0.1 |
|         | mg/l | mg/l  | mg/l | mg/l | mg/l | mg/l | mg/l |      |     |      |     |     |       |     |
| NOPPA15 | 14.8 | 4.32  | 2.08 | 5.27 | 8.45 | 5.87 | 12.6 | 1.9  | 2   | <1.0 | 7.6 | 0.1 | <0.50 | 13  |
| MIHP6   | 8.01 | 0.08  | 1.47 | 4.24 | 9.77 | 0.7  | 11.7 | 1.5  | 1.2 | <1.0 | 1.7 | 0.7 | <0.50 | 2.4 |
| MIHP15  | 11.1 | 4.88  | 1.78 | 5.75 | 8.82 | 0.34 | 14.5 | 0.93 | 1.9 | <1.0 | 2.6 | 0.3 | <0.50 | 1.6 |
| R56     | 10.2 | 0.39  | 1.08 | 2.09 | 46.5 | 0.5  | 8.1  | 1.6  | 2.2 | <1.0 | 25  | 0.9 | <0.50 | 2   |
| LOHI30  | 11.5 | 9.75  | 1.65 | 4.85 | 6.57 | 0.26 | 15.6 | 2.7  | 2.9 | <1.0 | 2.5 | 0.5 | <0.50 | 1.4 |
| KUU19   | 4.71 | <0.03 | 1.12 | 2.34 | 5.39 | 0.39 | 10.7 | 0.93 | 1.5 | <1.0 | 3.4 | 0.1 | 4.6   | 1.6 |
| HÄJY30  | 15.8 | 4.33  | 1.88 | 6.83 | 11.6 | 0.57 | 14.9 | 2    | 1.4 | <1.0 | 4.9 | 0.6 | <0.50 | 1.8 |
| MIETO17 | 8.42 | 1.47  | 1.97 | 4.03 | 8.32 | 0.93 | 14.6 | 1.3  | 1.2 | <1.0 | 2.8 | 0.2 | <0.50 | 2.7 |
| HARJA10 | 7.76 | 31.5  | 1.54 | 3.37 | 4.82 | <0.2 | 16.9 | 6.2  | 4.9 | <1.0 | 5.1 | 0.5 | <0.50 | 1.3 |
| HÄJY11  | 7.52 | <0.03 | 0.91 | 3.31 | 6.99 | 0.64 | 10.7 | 0.85 | 1   | <1.0 | 1.8 | 0.1 | <0.50 | 2.2 |

Supplementary Table 2. Sequencing statistics and ecological indices of bacteria, archaea and fungi

| BACTERIA | input  | filtered | denoisedF | nonchim   | Observed | Shannon | InvSimpson |         |            |
|----------|--------|----------|-----------|-----------|----------|---------|------------|---------|------------|
| HAJY30   | 88888  | 85405    | 82200     | 81763     | 1057     | 3,95    | 6,87       |         |            |
| MIETO17  | 111250 | 106901   | 103249    | 101466    | 1834     | 6,52    | 231,53     |         |            |
| NOPPA15  | 129603 | 124232   | 117975    | 116287    | 2468     | 6,69    | 198,54     |         |            |
| R56      | 116297 | 111468   | 110460    | 109656    | 329      | 2,91    | 6,69       |         |            |
| HARJA10  | 130910 | 125196   | 121306    | 120011    | 1897     | 6,25    | 138,12     |         |            |
| MIHP15   | 109288 | 104778   | 103311    | 99368     | 548      | 3,63    | 13,7       |         |            |
| LOHI30   | 310409 | 298127   | 294683    | 285277    | 3059     | 5,74    | 57,94      |         |            |
|          |        |          |           |           |          |         |            |         |            |
| ARCHAEA  | input  | filtered | denoisedF | nonchim   | Observed | Shannon | InvSimpson |         |            |
| HAJY30   | 180447 | 176050   | 173106    | 169508    | 1064     | 5,25    | 43,97      |         |            |
| MIETO17  | 126127 | 122966   | 120371    | 119426    | 670      | 4,67    | 20,45      |         |            |
| NOPPA15  | 139103 | 135718   | 132073    | 129952    | 1322     | 5,97    | 155,91     |         |            |
| R56      | 127166 | 123781   | 121905    | 120954    | 287      | 3,81    | 19,12      |         |            |
| HARJA10  | 143069 | 139093   | 135949    | 133467    | 947      | 5,24    | 35,96      |         |            |
| MIHP15   | 186686 | 181007   | 179189    | 178824    | 287      | 2,05    | 3,69       |         |            |
|          |        |          |           |           |          |         |            |         |            |
| FUNGI    | input  | filtered | denoisedF | denoisedR | merged   | nonchim | Observed   | Shannon | InvSimpson |
| HAJY30   | 74756  | 31808    | 31568     | 31177     | 30332    | 30332   | 202        | 3,91    | 22,03      |
| MIETO17  | 106318 | 41977    | 41395     | 40931     | 39543    | 39443   | 183        | 3,59    | 15,37      |
| NOPPA15  | 97693  | 35631    | 35062     | 34793     | 33596    | 33596   | 218        | 3,83    | 18,72      |
| R56      | 95089  | 34793    | 34137     | 33812     | 32020    | 32020   | 266        | 4,04    | 18,02      |
| HARJA10  | 150494 | 89321    | 88978     | 88551     | 84325    | 83575   | 261        | 2,66    | 4,80       |
| MIHP15   | 125638 | 62057    | 61428     | 60942     | 56223    | 56068   | 197        | 2,22    | 3,05       |

Supplementary Table 3. Prevalence of bacterial and archaeal ASVs in phylum level

| BACTERIA           |                                                     |                                                          | ARCHAEA             |                                                     |                                                    |
|--------------------|-----------------------------------------------------|----------------------------------------------------------|---------------------|-----------------------------------------------------|----------------------------------------------------|
| Phylum             | any ASV<br>belonging to<br>the phylum<br>on average | total<br>prevalence<br>numbers of<br>all phylum'<br>ASVs | Phylum              | any ASV<br>belonging to<br>the phylum<br>on average | total prevalence<br>numbers of all<br>phylum' ASVs |
| Patescibacteria    | 1.378026                                            | 2220                                                     | Nanoarchaeota       | 1.729965                                            | 2979                                               |
| Verrucomicrobiota  | 1.550877                                            | 1768                                                     | Micrarchaeota       | 1.716418                                            | 460                                                |
| Chloroflexi        | 1.424125                                            | 1464                                                     | Crenarchaeota       | 1.804233                                            | 341                                                |
| Proteobacteria     | 1.301911                                            | 1022                                                     | Iainarchaeota       | 1.466102                                            | 173                                                |
| Nanoarchaeota      | 1.404463                                            | 1007                                                     | NA                  | 1.586538                                            | 165                                                |
| Bacteroidota       | 1.203463                                            | 556                                                      | Aenigmarchaeota     | 1.707865                                            | 152                                                |
| Desulfobacterota   | 1.771127                                            | 503                                                      | Thermoplasmatota    | 1.869565                                            | 129                                                |
| Firmicutes         | 1.401099                                            | 255                                                      | Halobacterota       | 1.764706                                            | 90                                                 |
| Acidobacteriota    | 1.360000                                            | 238                                                      | Euryarchaeota       | 1.485714                                            | 52                                                 |
| Actinobacteriota   | 1.320755                                            | 210                                                      | Altiaarchaeota      | 1.700000                                            | 17                                                 |
| Nitrospirota       | 1.568182                                            | 207                                                      | Hadarchaeota        | 1.875000                                            | 15                                                 |
| Micrarchaeota      | 1.320611                                            | 173                                                      | Hydrothermarchaeota | 1.000000                                            | 4                                                  |
| Sva0485            | 2.047619                                            | 172                                                      |                     |                                                     |                                                    |
| Elusimicrobiota    | 1.226562                                            | 157                                                      |                     |                                                     |                                                    |
| Planctomycetota    | 1.094203                                            | 151                                                      |                     |                                                     |                                                    |
| Myxococcota        | 1.287234                                            | 121                                                      |                     |                                                     |                                                    |
| Iainarchaeota      | 1.391892                                            | 103                                                      |                     |                                                     |                                                    |
| Crenarchaeota      | 1.508772                                            | 86                                                       |                     |                                                     |                                                    |
| Methyloirabilota   | 2.088235                                            | 71                                                       |                     |                                                     |                                                    |
| Spirochaetota      | 1.244898                                            | 61                                                       |                     |                                                     |                                                    |
| Latescibacterota   | 1.270833                                            | 61                                                       |                     |                                                     |                                                    |
| Aenigmarchaeota    | 1.500000                                            | 54                                                       |                     |                                                     |                                                    |
| Bdellovibrionota   | 1.045455                                            | 46                                                       |                     |                                                     |                                                    |
| Cyanobacteria      | 1.166667                                            | 42                                                       |                     |                                                     |                                                    |
| Zixibacteria       | 1.950000                                            | 39                                                       |                     |                                                     |                                                    |
| Halobacterota      | 1.789474                                            | 34                                                       |                     |                                                     |                                                    |
| WOR-1              | 1.476190                                            | 31                                                       |                     |                                                     |                                                    |
| Gemmatimonadota    | 1.428571                                            | 30                                                       |                     |                                                     |                                                    |
| Thermoplasmatota   | 1.588235                                            | 27                                                       |                     |                                                     |                                                    |
| Armatimonadota     | 1.333333                                            | 24                                                       |                     |                                                     |                                                    |
| Fibrobacterota     | 1.150000                                            | 23                                                       |                     |                                                     |                                                    |
| Euryarchaeota      | 1.583333                                            | 19                                                       |                     |                                                     |                                                    |
| Dependentiae       | 1.000000                                            | 18                                                       |                     |                                                     |                                                    |
| DTB120             | 1.062500                                            | 17                                                       |                     |                                                     |                                                    |
| Campylobacterota   | 2.000000                                            | 16                                                       |                     |                                                     |                                                    |
| MBNT15             | 1.555556                                            | 14                                                       |                     |                                                     |                                                    |
| Desantisbacteria   | 1.181818                                            | 13                                                       |                     |                                                     |                                                    |
| Sumerlaeota        | 1.222222                                            | 11                                                       |                     |                                                     |                                                    |
| Nitrospinota       | 1.571429                                            | 11                                                       |                     |                                                     |                                                    |
| Edwardsbacteria    | 2.200000                                            | 11                                                       |                     |                                                     |                                                    |
| Margulisbacteria   | 1.250000                                            | 10                                                       |                     |                                                     |                                                    |
| NKB15              | 2.500000                                            | 10                                                       |                     |                                                     |                                                    |
| TA06               | 1.125000                                            | 9                                                        |                     |                                                     |                                                    |
| CK-2C2-2           | 1.600000                                            | 8                                                        |                     |                                                     |                                                    |
| WS4                | 1.750000                                            | 7                                                        |                     |                                                     |                                                    |
| Caldisericota      | 1.200000                                            | 6                                                        |                     |                                                     |                                                    |
| WPS-2              | 1.200000                                            | 6                                                        |                     |                                                     |                                                    |
| Caldatribacteriota | 3.000000                                            | 6                                                        |                     |                                                     |                                                    |
| FCPU426            | 1.000000                                            | 5                                                        |                     |                                                     |                                                    |
| WS2                | 1.000000                                            | 5                                                        |                     |                                                     |                                                    |
| Hadarchaeota       | 1.666667                                            | 5                                                        |                     |                                                     |                                                    |
| LCP-89             | 2.500000                                            | 5                                                        |                     |                                                     |                                                    |
| Calditrichota      | 1.000000                                            | 4                                                        |                     |                                                     |                                                    |
| Firestonebacteria  | 1.000000                                            | 4                                                        |                     |                                                     |                                                    |
| Schekmanbacteria   | 1.333333                                            | 4                                                        |                     |                                                     |                                                    |
| Abditibacteriota   | 1.000000                                            | 3                                                        |                     |                                                     |                                                    |
| Acetothermia       | 1.000000                                            | 2                                                        |                     |                                                     |                                                    |
| Entotheonellaeota  | 1.000000                                            | 2                                                        |                     |                                                     |                                                    |
| Hydrogenedentes    | 1.000000                                            | 2                                                        |                     |                                                     |                                                    |
| NB1-j              | 1.000000                                            | 2                                                        |                     |                                                     |                                                    |
| TX1A-33            | 1.000000                                            | 1                                                        |                     |                                                     |                                                    |

Supplementary Figure 1: a) Bacterial b) archaeal and c) fungal communities in groundwater samples, shown as interactive Krona-charts.

Provided as .html -files

Kurikkabac-krona1.html

Kurikkaarc-krona1.html

Kurikkafun-krona1.html
